# Supplementary material for: Transcriptional programming using engineered systems of transcription factors and genetic architectures
Source: PubMed Central journal article supplement (PMC6803630; doi:10.1038/s41467-019-12706-4), 2019-10-21
Supplement: 41467_2019_12706_MOESM2_ESM.pdf [file 41467_2019_12706_MOESM2_ESM.pdf]

## **Description of Additional Supplementary Files**

File Name: Supplementary Data 1

Description: Sequences for all primers used in this work both for synthesis and plasmid construction  
– Separate Excel Spreadsheet.

File Name: Supplementary Data 2

Description: Statistical Data for all functional repressors including p-values and effect sizes (Cohen's d values) – Separate Excel Spreadsheet.

File Name: Supplementary Software 1

Description: Custom software used to calculate the combinatorial count in Supplementary Table 1.  
With installation guide source code, pseudocode and General Public License included.
